# Supplementary material for: Characterization of the MG828507 lncRNA Located Upstream of the FLT1 Gene as an Etiology for Pre-Eclampsia
Source: MDPI journal article supplement (doi:10.3390/jcm11154603), 2022-08-07
Supplement: s1 [file s1]

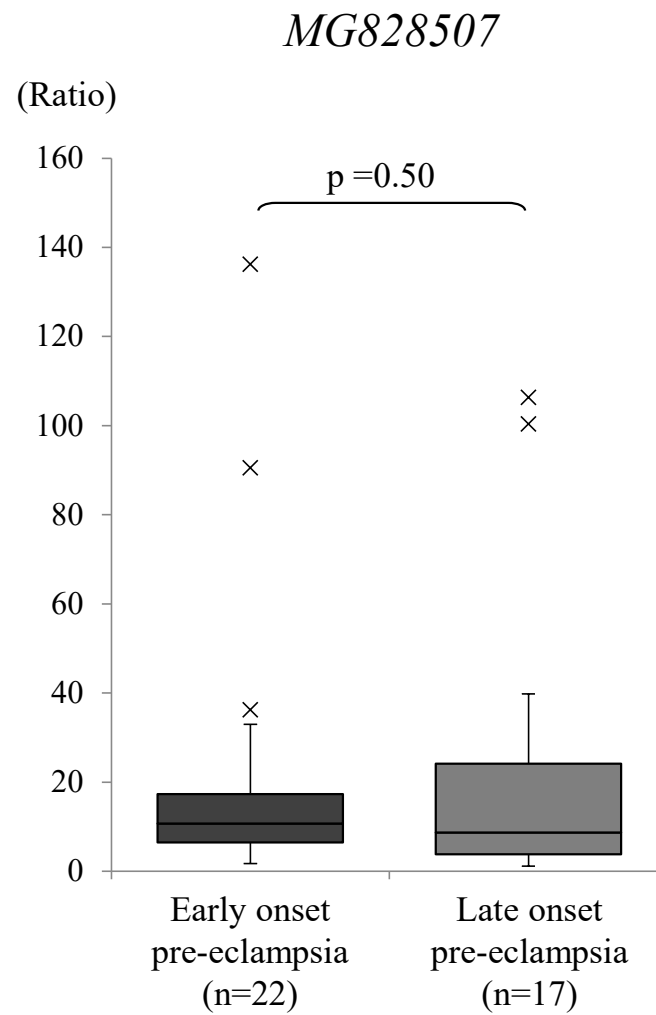

Supplementary Figure S1: Correlations between *MG828507* expression and disease onset

**A**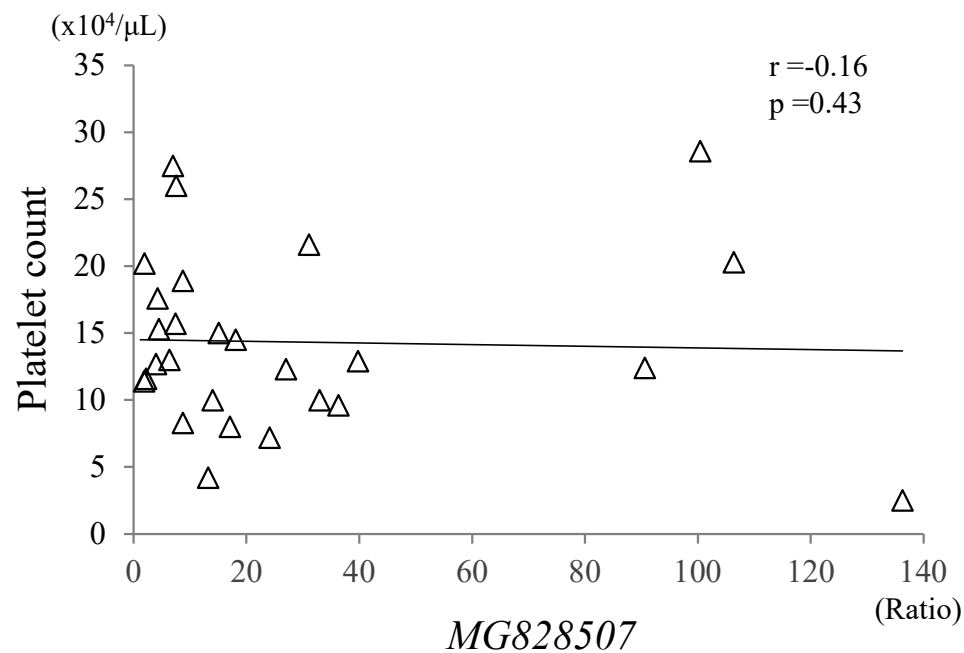**B**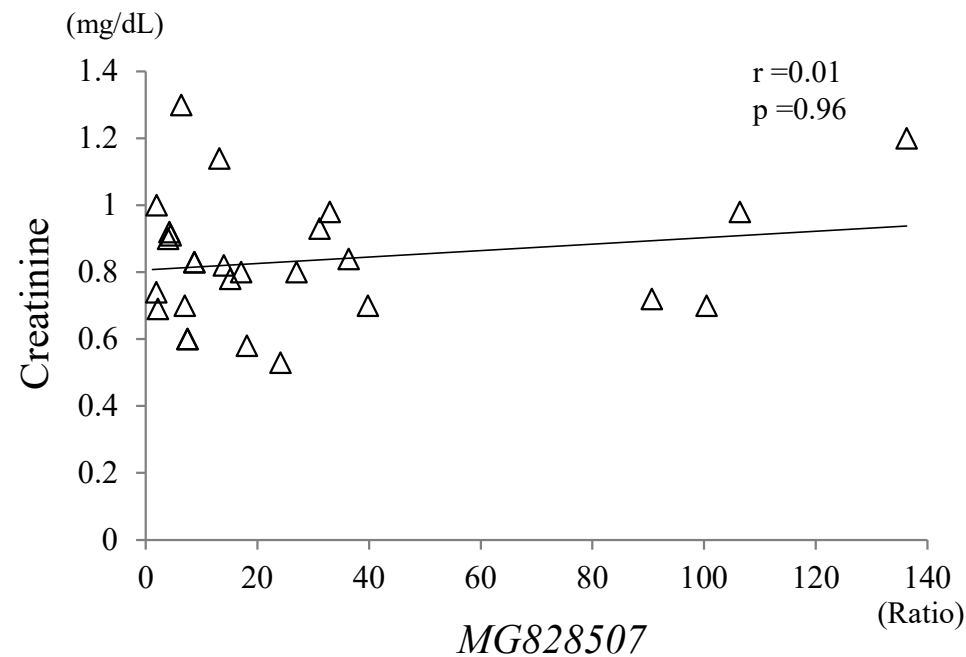**C**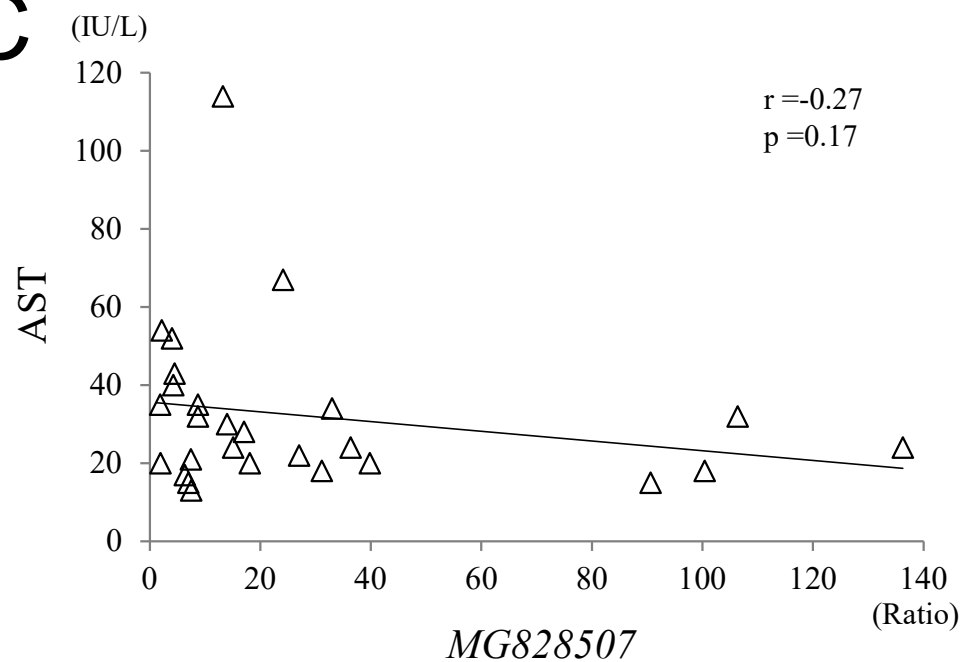**D**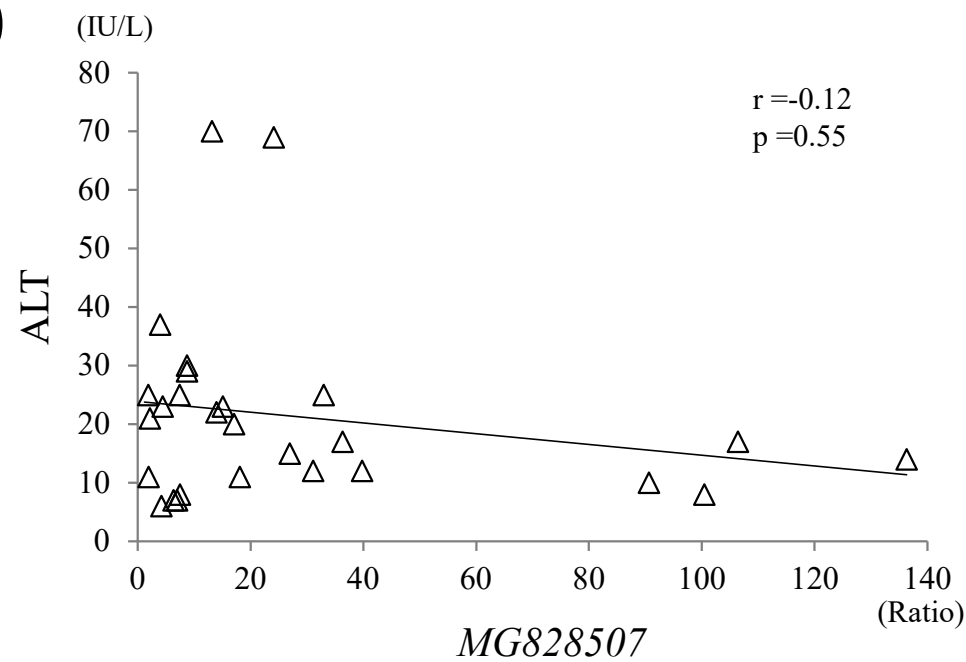

Supplementary Figure S2: Correlations between *MG828507* expression and clinical parameters
